# Supplementary material
Source: PubMed Central journal article supplement (PMC9617899)
Supplement: 41467_2022_34186_MOESM1_ESM.pdf [file 41467_2022_34186_MOESM1_ESM.pdf]

# Supporting Information: Tracing the international arrivals of SARS-CoV-2 Omicron variants after Aotearoa New Zealand reopened its border

Jordan Douglas<sup>1,\*</sup>, David Winter<sup>2</sup>, Andrea McNeill<sup>2</sup>, Sam Carr<sup>2</sup>, Michael Bunce<sup>2</sup>, Nigel French<sup>3,4</sup>, James Hadfield<sup>5</sup>, Joep de Ligt<sup>2</sup>, David Welch<sup>1</sup>, Jemma L Geoghegan<sup>2,6</sup>

<sup>1</sup>Centre for Computational Evolution, School of Computer Science, University of Auckland, Auckland, New Zealand.

<sup>2</sup>Institute of Environmental Science and Research, Wellington, New Zealand.

<sup>3</sup>Tāwharau Ora/School of Veterinary Science, Massey University, Palmerston North, New Zealand.

<sup>4</sup>Te Niwha, Infectious Diseases Research Platform, Institute of Environmental Science and Research.

<sup>5</sup>Fred Hutchinson Cancer Research Centre, Seattle, Washington, USA.

<sup>6</sup>Department of Microbiology and Immunology, University of Otago, Dunedin, New Zealand.

\*To whom correspondence should be addressed: [jordan.douglas@auckland.ac.nz](mailto:jordan.douglas@auckland.ac.nz)

**Figure S1** details the genomic sampling bias across the district health boards (DHB) of New Zealand. **Figures S2-S5** present the phylogenies of Omicron variants BA.1, BA.2, BA.2.12.1, and BA.4.

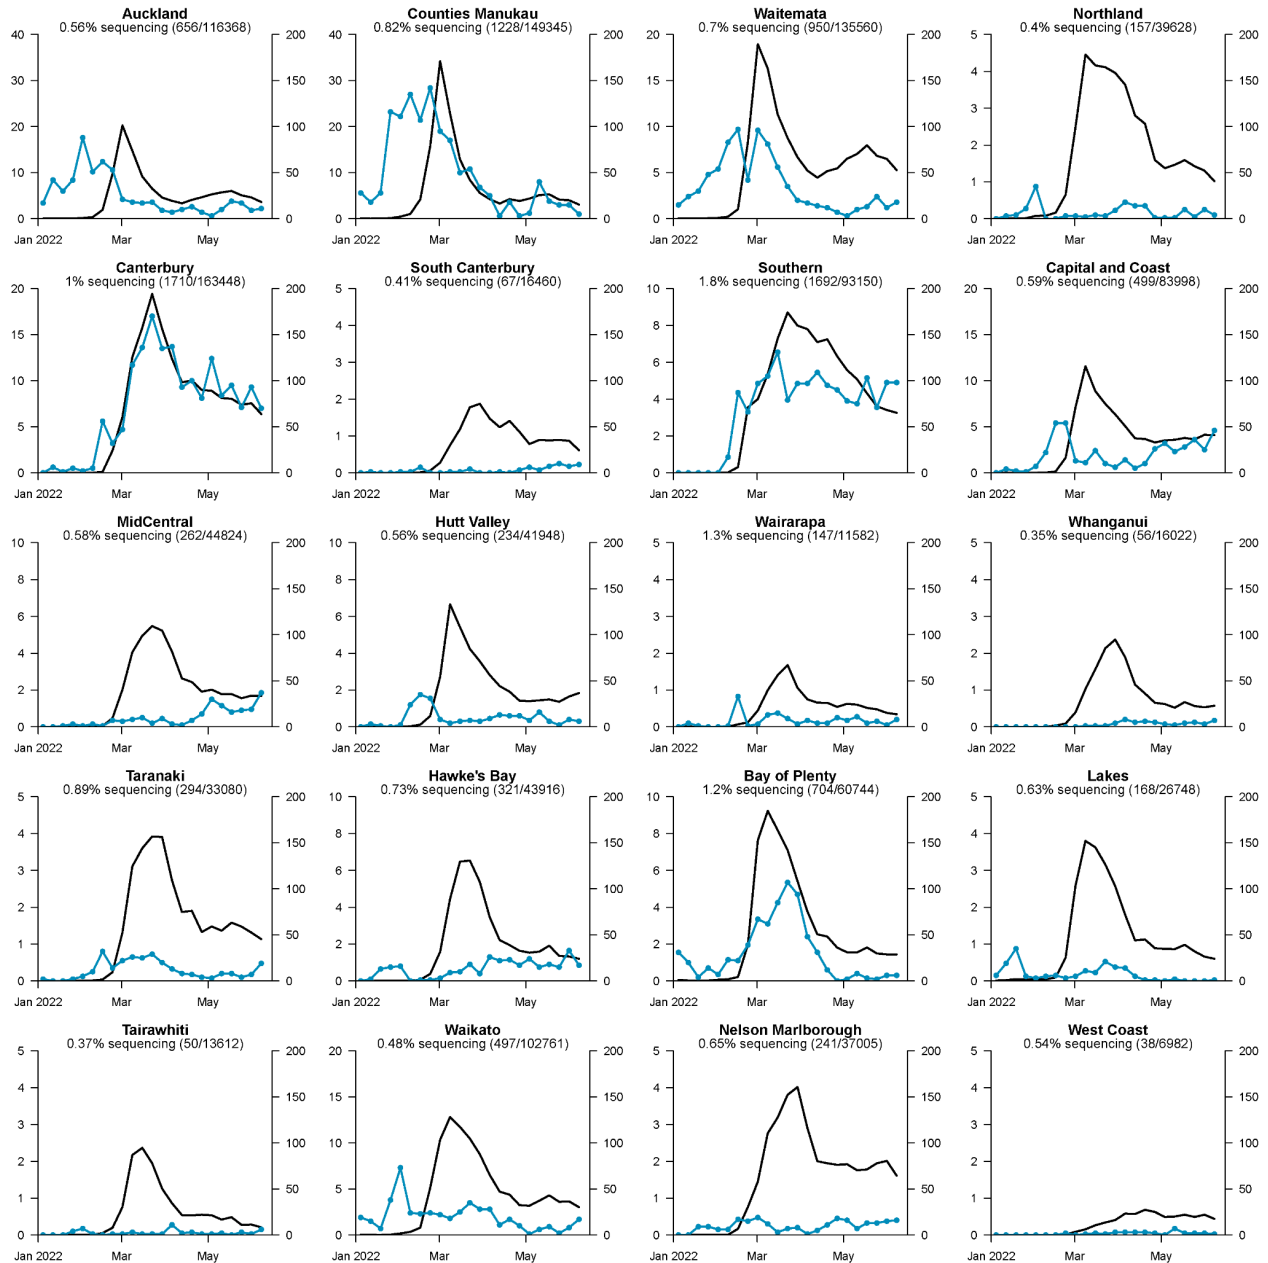

**Figure S1.** Thousands of cases (black curve; left axis) and number of genomes (dotted blue curve; right axis) by district health board. Genomic surveillance was especially proactive at Canterbury and the Auckland-based district health boards (Auckland, Counties Manukau, and Waitemata) due to their proximity to major international airports which saw a great amount of travel activity during the border reopening period.

BA.1

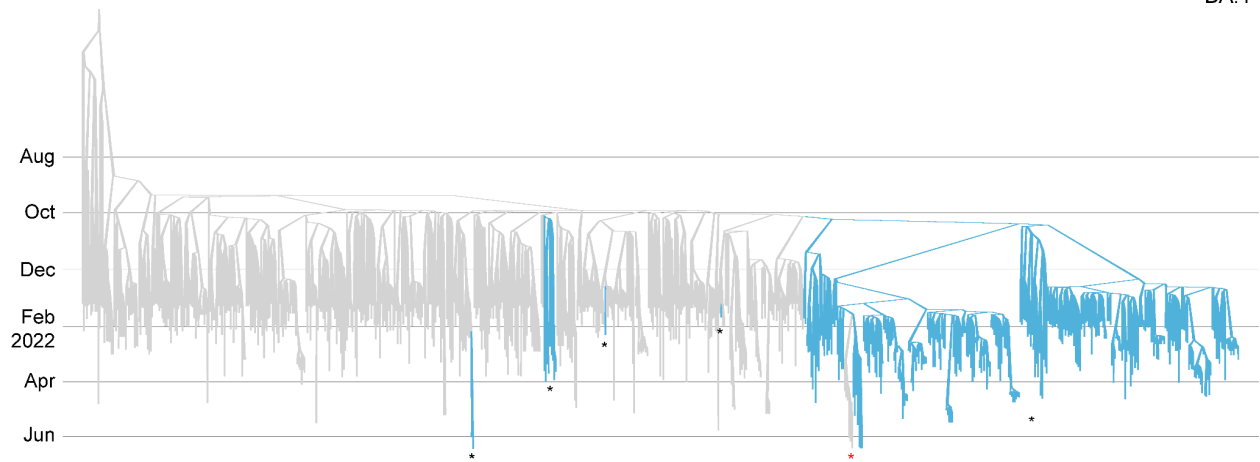

**Figure S2.** Summary tree of the BA.1 analysis. Lineages are coloured by world (grey) or community (blue). Introduction events from the world to the community are indicated by black stars \*, while export events from the community to the border are indicated by red stars \*. There are no export events from the community to the overseas pool in the summary tree.

BA.2

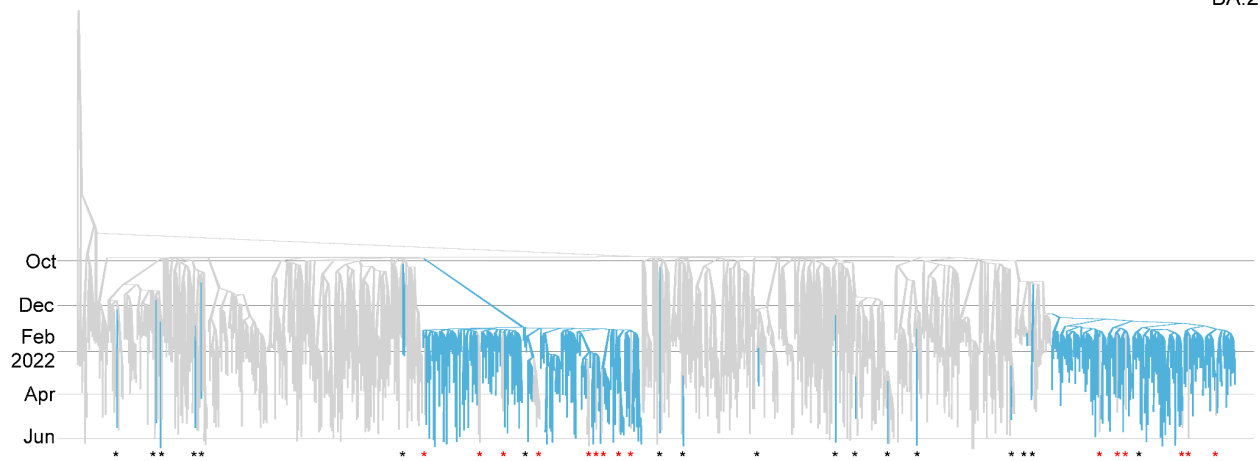

**Figure S3.** Summary tree of the BA.2 analysis. Lineages are coloured by world (grey) or community (blue). Introduction events from the world to the community are indicated by black stars \*, while export events from the community to the border are indicated by red stars \*. There are no export events from the community to the overseas pool in the summary tree.

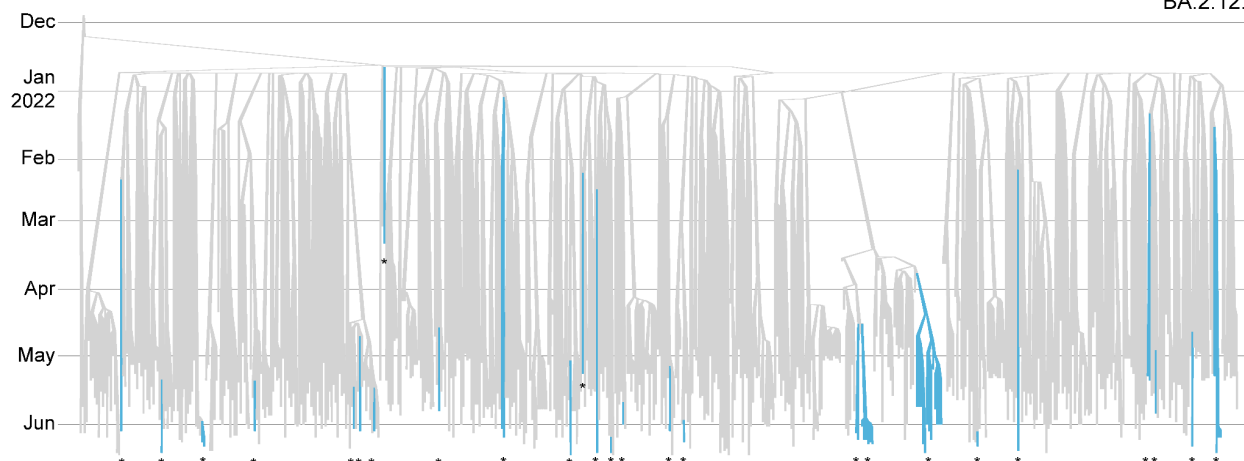

**Figure S4.** Summary tree of the BA.2.12.1 analysis. Lineages are coloured by world (grey) or community (blue). Introduction events from the world to the community are indicated by black stars \*. There are no export events from the community to the global pool in the summary tree.

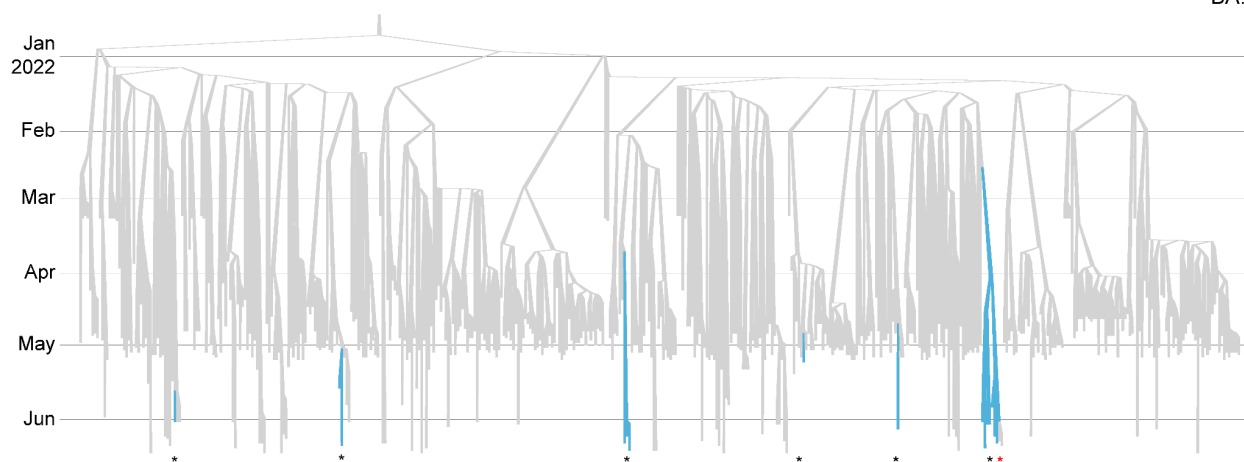

**Figure S5.** Summary tree of the BA.4 analysis. Lineages are coloured by world (grey) or community (blue). Tree heights are in units for years, where time 0 is 15 Jun 2022. Introduction events from the world to the community are indicated by black stars \*, while export events from the community to the border are indicated by red stars \*.
